# Supplementary material for: ‘Sirim’ (Cold) Pain as a Common Symptom in Korean Patients with Clinically Suspected Small-Fiber Neuropathy
Source: PubMed Central journal article supplement — J Clin Neurol. 2019 Jul 25;15(4):480–7. doi: 10.3988/jcn.2019.15.4.480 (PMC6785466; doi:10.3988/jcn.2019.15.4.480), 2019-07-25
Supplement: jcn-15-480-s001.pdf [file jcn-15-480-s001.pdf]

**Supplementary Table 1.** Comparison between patients with idiopathic and nonidiopathic SFN

|                                                    | Idiopathic SFN (n=41) | Nonidiopathic SFN (n=22) | p      |
|----------------------------------------------------|-----------------------|--------------------------|--------|
| Sex, female                                        | 19 (46.3)             | 11 (50.0)                | 0.782  |
| Age at diagnosis, years                            | 56.3±11.2             | 56.8±11.2                | 0.873  |
| Age at onset, years                                | 53.3±10.9             | 50.0±9.9                 | 0.240  |
| Duration of symptoms, months                       | 24.0 [9.50–50.55]     | 36.0 [8.90–88.50]        | 0.160  |
| BMI, kg/m <sup>2</sup>                             | 23.5±2.7              | 22.6±3.3                 | 0.243  |
| Abnormal QST results, cold detection threshold (%) | 28/37 (75.7)          | 17/20 (85.0)             | 0.410  |
| Abnormal QSART results (%)                         | 25/35 (71.4)          | 14/21 (66.7)             | 0.708  |
| <b>SFN-SIQ plus 'Sirim'</b>                        |                       |                          |        |
| Changes in sweating pattern                        | 0 [0–0]               | 0 [0–0]                  | 0.103* |
| Diarrhea                                           | 0 [0–1]               | 0 [0–1]                  | 0.199* |
| Constipation                                       | 0 [0–1]               | 0 [0–1]                  | 0.845* |
| Micturition problems                               | 1 [0–2]               | 0 [0–1.25]               | 0.301* |
| Dry eyes                                           | 1 [0–2]               | 1.5 [0–3]                | 0.826* |
| Dry mouth                                          | 1 [0–2]               | 1 [0–3]                  | 0.422* |
| Dizziness on standing                              | 1 [0–2]               | 1 [0–1.25]               | 0.722* |
| Palpitations                                       | 1 [0–1]               | 1 [0–1]                  | 0.752* |
| Hot flashes                                        | 1 [0–2]               | 1 [0–3]                  | 0.202* |
| Sensitive skin                                     | 1 [0–3]               | 2 [0–3]                  | 0.274* |
| Burning feet                                       | 0 [0–2]               | 2 [0.75–3]               | 0.011* |
| Sheet intolerance                                  | 0 [0–0]               | 0 [0–1.25]               | 0.081* |
| Restless legs                                      | 0 [0–1]               | 1 [0–2]                  | 0.216* |
| 'Sirim'                                            | 3 [1–3]               | 3 [3–3]                  | 0.003* |
| <b>NPSI plus 'Sirim' pain</b>                      |                       |                          |        |
| Burning pain                                       | 0 [0–7]               | 4.5 [0–8]                | 0.106* |
| Squeezing pain                                     | 1 [0–6]               | 3 [0–5.25]               | 0.368* |
| Pressure pain                                      | 0 [0–3]               | 0 [0–3]                  | 0.457* |
| Stabbing pain                                      | 0 [0–1]               | 0 [0–2.25]               | 0.793* |
| Electric-shock-like pain                           | 3 [0–6]               | 3.5 [0–7]                | 0.400* |
| Brush-evoked pain                                  | 0 [0–0]               | 3 [0–9]                  | 0.001* |
| Pressure-evoked pain                               | 0 [0–1]               | 0 [0–5]                  | 0.122* |
| Cold-evoked pain                                   | 1 [0–6]               | 4.5 [0–10]               | 0.371* |
| Pins-and-needles sensation                         | 0 [0–5]               | 3 [0–6]                  | 0.306* |
| Tingling sensation                                 | 2 [0–7]               | 5.5 [3–8]                | 0.023* |
| 'Sirim' pain                                       | 6 [0–8]               | 8 [6.75–10]              | 0.004* |
| SF-36: physical component score                    | 55.0±24.8             | 51.4±22.9                | 0.576  |
| SF-36: mental component score                      | 58.0±23.9             | 52.7±22.5                | 0.388  |

Data are n (%), mean±SD, or median [interquartile range] values.

\*p value before applying multiple-comparison corrections.

BMI: body mass index, NPSI: Neuropathic Pain Symptom Inventory, QSART: quantitative sudomotor axon reflex test, QST: quantitative sensory testing, SF-36: 36-item Short-Form Health Survey, SFN-SIQ: Small-Fiber Neuropathy Symptoms Inventory Questionnaire.
